# Supplementary material for: Arecaceae Seeds Constitute a Healthy Source of Fatty Acids and Phenolic Compounds
Source: MDPI journal article supplement (doi:10.3390/plants12020226), 2023-01-04
Supplement: s1 [file s1]

Table S2: HPLC-DAD and LC-MS parameters used for the analysis of phenolic-enriched extracts of Arecaceae seeds

|                                                     |             |                                         | LC-MS parameters                  |                                  |                    | HPLC-DAD parameters          |                                               |                |                |                      |
|-----------------------------------------------------|-------------|-----------------------------------------|-----------------------------------|----------------------------------|--------------------|------------------------------|-----------------------------------------------|----------------|----------------|----------------------|
| N°                                                  | Rt<br>(min) | Phenolic compound                       | m/z precursor<br>ion <sup>a</sup> | m/z fragment<br>ion <sup>b</sup> | Ionization<br>mode | Detection<br>wavelength (nm) | Correlation<br>coefficients (R <sup>2</sup> ) | LOD<br>(µg/mL) | LOQ<br>(µg/mL) | Recovery<br>rate (%) |
| <i>Compounds identified by Rt and m/z ions</i>      |             |                                         |                                   |                                  |                    |                              |                                               |                |                |                      |
| 1                                                   | 8.73        | Quinic acid                             | 191.05611                         | 127.04020                        | Negative           | 280                          | -                                             | -              | -              | -                    |
| 2                                                   | 9.59        | Chelidonic acid                         | 182.99351                         | 139.0037                         | Negative           | 280                          | -                                             | -              | -              | -                    |
| 3                                                   | 10.12       | <i>Trans</i> -aconitic acid             | 179.03498                         | 140.9253                         | Negative           | 280                          | -                                             | -              | -              | -                    |
| 4                                                   | 11.98       | Gallic acid                             | 169.01425                         | 125.02319                        | Negative           | 280                          | 1.000                                         | 0.13           | 0.25           | 100.95               |
| 5                                                   | 14.40       | Vanillic acid                           | 167.0349                          | 108.02023                        | Negative           | 280                          | 0.088                                         | 0.20           | 0.70           | 89.98                |
| 6                                                   | 19.42       | Protocatechuic acid                     | 153.01933                         | 109.0297                         | Negative           | 280                          | 0.998                                         | 0.18           | 0.45           | 97.30                |
| 7                                                   | 26.11       | Salicylic acid                          | 137.02442                         | 98.46700                         | Negative           | 280                          | 0.988                                         | 0.30           | 0.90           | 89.98                |
| 8                                                   | 28.02       | 4-hydroxybenzoic acid                   | 137.02442                         | 93.03325                         | Negative           | 280                          | 1.000                                         | 0.20           | 0.40           | 100.05               |
| 9                                                   | 29.19       | DL- <i>p</i> -hydroxyphenyl lactic acid | 181.05063                         | 153.07027                        | Negative           | 280                          | 1.000                                         | 0.30           | 0.75           | 102.15               |
| 10                                                  | 30.07       | 2,4-dihydroxyhydrocinnamic acid         | 181,05063                         | 137.075356                       | Negative           | 280                          | 0.997                                         | 0.20           | 0.65           | 97.99                |
| 11                                                  | 32.98       | 3,4-dihydroxyhydrocinnamic acid         | 163.04007                         | 93.03316                         | Negative           | 280                          | 0.996                                         | 0.20           | 0.50           | 101.85               |
| 12                                                  | 35.62       | Chlorogenic acid                        | 355.10236                         | 163.03566                        | Positive           | 280                          | 0.999                                         | 0.30           | 0.50           | 99.80                |
| 13                                                  | 37.92       | Caffeic acid                            | 179.03498                         | 135.04429                        | Negative           | 320                          | 0.999                                         | 0.40           | 0.90           | 96.25                |
| 14                                                  | 38.14       | (-)-Catechin                            | 291.08631                         | 139.03895                        | Positive           | 280                          | 0.989                                         | 0.30           | 0.90           | 94.78                |
| 15                                                  | 40.89       | Syringic acid                           | 198.05337                         | 123.00734                        | Negative           | 280                          | 1.000                                         | 0.35           | 0.75           | 100.10               |
| 16                                                  | 41.98       | Dactylifric acid                        | 337.09055                         | 271.02426                        | Positive           | 280                          | -                                             | -              | -              | -                    |
| 17                                                  | 44.55       | <i>Trans-p</i> -coumaric acid           | 163.04007                         | 119.04881                        | Negative           | 280                          | 0.998                                         | 0.30           | 0.60           | 96.15                |
| 18                                                  | 48.30       | Ferulic acid                            | 193.05063                         | 134.03643                        | Negative           | 280                          | 0.985                                         | 0.30           | 0.50           | 99.85                |
| 19                                                  | 49.88       | Sinapic acid                            | 223.0612                          | 121,02821                        | Negative           | 280                          | 0.998                                         | 0.20           | 0.50           | 98.98                |
| 20                                                  | 53.25       | Eriodictyol                             | 287.05611                         | 153,0176                         | Negative           | 280                          | -                                             | -              | -              | -                    |
| 21                                                  | 55.50       | Rutin                                   | 609.14611                         | 301.03474                        | Negative           | 320                          | 0.997                                         | 0.20           | 0.50           | 98.90                |
| 22                                                  | 58.15       | Rosmarinic acid                         | 359.07724                         | 299.0914                         | Negative           | 320                          | 0.994                                         | 0.40           | 0.60           | 97.90                |
| 23                                                  | 64.43       | 2-Hydroxy-4-methoxy benzoic acid        | 167.03498                         | 93.03325                         | Negative           | 280                          | 0.999                                         | 0.20           | 0.50           | 100.95               |
| 24                                                  | 67.83       | Naringenin                              | 271,0612                          | 153,01779                        | Negative           | 280                          | 0.995                                         | 0.40           | 0.50           | 99.89                |
| 25                                                  | 69.09       | Quercetin                               | 301.03538                         | 271.02426                        | Negative           | 280                          | 0.994                                         | 0.40           | 0.60           | 99.20                |
| 26                                                  | 72.79       | Luteolin                                | 285.04046                         | 133.02834                        | Negative           | 280                          | 0.991                                         | 0.30           | 0.50           | 100.20               |
| 27                                                  | 76.58       | Kaempferol                              | 287.05501                         | 153.0176                         | Positive           | 320                          | 0.987                                         | 0.20           | 0.40           | 96.50                |
| <i>Compounds identified by m/z ions<sup>c</sup></i> |             |                                         |                                   |                                  |                    |                              |                                               |                |                |                      |
| 28                                                  |             | Resveratrol                             | 227.07137                         | 147.09125                        | Positive           | -                            | -                                             | -              | -              | -                    |
| 29                                                  |             | Piceatannol                             | 243.06628                         | 166.1070                         | Negative           | -                            | -                                             | -              | -              | -                    |

|    |                                                 |           |           |          |   |   |   |   |   |
|----|-------------------------------------------------|-----------|-----------|----------|---|---|---|---|---|
| 30 | Pinocembrin                                     | 255.06628 | 213.05467 | Negative | - | - | - | - | - |
| 31 | Genistein                                       | 271.06010 | 254.05581 | Positive | - | - | - | - | - |
| 32 | Apigenin                                        | 271.06010 | 153.01779 | Positive | - | - | - | - | - |
| 33 | Phloretin                                       | 275.09140 | 167.03498 | Negative | - | - | - | - | - |
| 34 | Fisetin                                         | 285.04046 | 135.00725 | Negative | - | - | - | - | - |
| 35 | Luteolin                                        | 285.04046 | 175.03898 | Negative | - | - | - | - | - |
| 36 | Sakuranetin                                     | 285.07685 | -         | Negative | - | - | - | - | - |
| 37 | Cianidin                                        | 287.05501 | -         | Positive | - | - | - | - | - |
| 38 | Epicatechin (-)                                 | 291.08631 | 123.04491 | Negative | - | - | - | - | - |
| 39 | Delphinidine                                    | 303.04993 | -         | Positive | - | - | - | - | - |
| 40 | Epigallocatechin (-)                            | 305.06668 | 255.9227  | Negative | - | - | - | - | - |
| 41 | Gallocatechin (-)                               | 307.08123 | 139.03884 | Positive | - | - | - | - | - |
| 42 | Petunidine                                      | 317.06558 | -         | Positive | - | - | - | - | - |
| 43 | Bilobalide                                      | 325.09289 | 163.11152 | Negative | - | - | - | - | - |
| 44 | Malvidine                                       | 331.08123 | 315.0499  | Positive | - | - | - | - | - |
| 45 | Ferulic acid hexoside                           | 355.10346 | 134.03643 | Negative | - | - | - | - | - |
| 46 | Piceid (resveratrol-3-O-beta-D-glucopyranoside) | 391.13874 | -         | Positive | - | - | - | - | - |
| 47 | Apigenin-6-C-glucoside (isovitexin)             | 431.09837 | 311.05586 | Negative | - | - | - | - | - |
| 48 | Phloridzin                                      | 435.12967 | 273.07598 | Negative | - | - | - | - | - |
| 49 | Quercetin-3-O-rhamnoside (quercitrin)           | 447.09328 | 301.0339  | Negative | - | - | - | - | - |
| 50 | Isorhamnetin-3-O-glucoside                      | 479.11840 | 317.0655  | Positive | - | - | - | - | - |
| 51 | Lithospermic acid                               | 537.10385 | 475.11801 | Negative | - | - | - | - | - |
| 52 | Procyanidin B1                                  | 577.13515 | 289.07154 | Negative | - | - | - | - | - |
| 53 | Kaempferol-3-O-rutinoside                       | 593.15119 | 285.03973 | Negative | - | - | - | - | - |
| 54 | Pelargonidine                                   | 595.16575 | 271.0601  | Positive | - | - | - | - | - |
| 55 | Eriocitrin                                      | 595.16684 | -         | Negative | - | - | - | - | - |
| 56 | Hesperidin                                      | 609.18249 | -         | Negative | - | - | - | - | - |
| 57 | Delphinidin-3-O-(6-O-p-coumaroyl)-glucoside     | 611.13953 | -         | Positive | - | - | - | - | - |
| 58 | Isohamnetin-3-O-rutinoside                      | 623.16176 | 315.0508  | Negative | - | - | - | - | - |

<sup>a</sup> Mass error lower than 5 ppm.

<sup>b</sup> Mass error lower than 10 ppm.

<sup>c</sup> Phenolic compounds identified by LC-MS.
