# Supplementary material for: Arecaceae Seeds Constitute a Healthy Source of Fatty Acids and Phenolic Compounds
Source: MDPI journal article supplement (doi:10.3390/plants12020226), 2023-01-04
Supplement: s1 [file s1]

Table S1: Selected data on the main fatty acids and phenolics profiles of Arecaceae seeds

| Species                                                           | FA% of total FA <sup>a</sup>                                   | Main Phenolics <sup>a</sup> | Total Phenolics <sup>a</sup> | Total oil/FA | Reference                    |
|-------------------------------------------------------------------|----------------------------------------------------------------|-----------------------------|------------------------------|--------------|------------------------------|
| <b>Subfamily Arecoideae</b>                                       |                                                                |                             |                              |              |                              |
| <b>Tribe Areceae</b>                                              |                                                                |                             |                              |              |                              |
| <i>Archontophoenix cunninghamiana</i>                             | PA 15, SA 7.9, OA 48.3, LA 23.5, ALA 1                         |                             |                              | 3.39         | Ndukwe and Ugboaja, 2019     |
| <i>A. cunninghamiana</i>                                          | PA 15, SA 8, OA 48, LA 24, ALA 1                               |                             |                              | 3.4          | Ndukwe and Ugboaja, 2019     |
| <i>A. cunninghamiana</i>                                          | LaA 5, MA 4, PA 17, SA 2, OA 34, LA 37, ALA 1                  |                             |                              | 3.3          | Guerin et al., 2020          |
| <i>Chambeyronia microspadix</i>                                   | LaA 5, MA 17, PA 18, SA 4, OA 31, LA 23                        |                             |                              | 6.6          | Guerin et al., 2020          |
| <i>Dypsis lutescens</i> (syn. <i>Chrysalidocarpus lutescens</i> ) | CA 1, LaA 41, MA 27, PA 12, SA 1, OA 11, LA 8                  |                             |                              | 2.3          | Daulatabad and Ankalgi, 1983 |
| <i>Howea forsteriana</i>                                          | CyA 2, CA 2, LaA 46, MA 12, PA 6, SA 3, OA 21, LA 9            |                             |                              | 13.7         | Litchfield, 1970             |
| <i>H. forsteriana</i>                                             | CyA 1, CA 1, LaA 34, MA 13, PA 9, SA 4, OA 25, LA 13           |                             |                              | 10.3         | Guerin et al., 2020          |
| <b>Tribe Chamaedoreae</b>                                         |                                                                |                             |                              |              |                              |
| <i>Chamaedorea microspadix</i>                                    | LaA 5, MA 17, PA 18, SA 4, OA 31, LA 23                        |                             |                              | 4.5          | Guerin et al., 2020          |
| <b>Tribe Cocoseae</b>                                             |                                                                |                             |                              |              |                              |
| <i>Butia capitata</i>                                             |                                                                |                             |                              | 59.5         | Litchfield, 1970             |
| <i>B. capitata</i>                                                | CyA 16, CA 16, LaA 39, MA 6, PA 4, SA 3, OA 12, LA 4           |                             |                              | 59.6         | Opute, 1979                  |
| <i>B. capitata</i>                                                | CyA 8, CA 11, LaA 39, MA 8, PA 5, SA 2, OA 21, LA 5            |                             |                              | 52           | Vieira et al., 2016          |
| <i>B. capitata</i>                                                | CyA 14, CA 16, LaA 36, MA 7, PA 5, SA 2, OA 17, LA 4           |                             |                              | 59.0         | Guerin et al., 2020          |
| <i>Cocos nucifera</i>                                             | CO 1, CY 10, CA 6.8, LaA 48, MA 19, PA 8, SA 2, OA 5, LA1 mol% |                             |                              | 65-72        | Litchfield, 1970             |

|                               |                                                                                                                                       |                                                                                                                                   |       |                                  |
|-------------------------------|---------------------------------------------------------------------------------------------------------------------------------------|-----------------------------------------------------------------------------------------------------------------------------------|-------|----------------------------------|
| <i>C. nucifera</i>            | CyA 12, CA 16, LaA 43, MA 6, PA 4, SA 3, OA 12, LA 4                                                                                  |                                                                                                                                   | 66.5  | Opute, 1979                      |
| <i>C. nucifera</i>            | CyA 10, CA 6, LaA 52, MA 19, Caf 3, CiA 2, Cou 10, Fer 2, Gal 25, HBA 8, Syr 18, 1.4 mg/100 g PA 7, SA 4, OA 4, LA 1 VanA 64 µg/100 g |                                                                                                                                   | 60    | Appaiah et al., 2014             |
| <i>C. nucifera</i>            | CA 4, LaA 52, MA 22, PA 9, SA 3, OA 9                                                                                                 | 8 mg GAE/100 g DW                                                                                                                 | 72    | Ghosh et al., 2014               |
| <i>C. nucifera</i>            | -                                                                                                                                     | Caf 4, Cat 2, mCou 1, pCou 3, Gal 3, pHBA 3, Sal 3, 6-10 mg GAE/100 g FW Syr 1                                                    | 24    | Mahayothee et al., 2016          |
| <i>C. nucifera</i>            | CyA 3, CA 6, LaA 51, MA 18, PA - 10, SA 4, OA 7, LA 1                                                                                 | -                                                                                                                                 | 28-32 | Ngampeerapong and Chavasit, 2019 |
| <i>C. nucifera</i>            | CyA 9, CA 7, LaA 49, MA 18, PA 9, SA 3, OA 4, LA 1                                                                                    |                                                                                                                                   | 62.6  | Guerin et al., 2020              |
| <i>Syagrus romanzoffiana</i>  | CyA 7, CA 6, LaA 33, MA 10, PA 8, SA 3, OA 28, LA 4                                                                                   | 384 mg GAE/100 g                                                                                                                  | 46.0  | Coimbra and Jorge, 2012          |
| <i>S. romanzoffiana</i>       |                                                                                                                                       | Bis-stilbene: syagrusin; bis-stilbenes: scirpusins E, B, A; stilbenoids: syagrusin A, scirpusin C, scirpusin D, 5-hydroxyaiphanol |       | Chang and Lee, 2014              |
| <i>S. romanzoffiana</i>       | CyA 6, CA 6, LaA 37, MA 11, PA 8, SA 3, OA 24, LA 5                                                                                   |                                                                                                                                   |       | Moreira et al., 2013             |
| <i>S. romanzoffiana</i>       | CyA 13, CA 10, LaA 43, MA 9, PA 6, SA 3, OA 14, LA 2                                                                                  |                                                                                                                                   | 59.0  | Guerin et al., 2020              |
| <i>S. romanzoffiana</i>       | CyA 9, CA 7, LaA 37, MA 10, PA 8, SA 2, OA 21, LA 5                                                                                   |                                                                                                                                   | 43.0  | Tavares et al., 2021             |
| <i>S. romanzoffiana</i>       | CA 6, LaA 24, MA 14, PA 13, SA 10, OA 28, LA 5                                                                                        |                                                                                                                                   | -     | Rodrigues et al., 2022           |
| <b>Subfamily Coryphoideae</b> |                                                                                                                                       |                                                                                                                                   |       |                                  |
| <b>Tribe Caryoteae</b>        |                                                                                                                                       |                                                                                                                                   |       |                                  |
| <i>Arenga engleri</i>         | CyA 7, CA 6, LaA 44, MA 10, PA 10, SA 3, OA 12, LA 9                                                                                  |                                                                                                                                   | 6.7   | Guerin et al., 2020              |

**Tribe Phoeniceae**

|                                                    |                                                       |                                                                                                                                                           |       |                              |
|----------------------------------------------------|-------------------------------------------------------|-----------------------------------------------------------------------------------------------------------------------------------------------------------|-------|------------------------------|
| <i>Phoenix canariensis</i>                         | LaA 3-10, MA 2-8, PA 10-11, SA 2, OA 47-60, LA 19-25  |                                                                                                                                                           | 10-15 | Nehdi et al., 2011           |
| <i>P. canariensis</i>                              | CyA 1, CA 1, LaA 33, MA 12, PA 8, SA 2, OA 33, LA 11  |                                                                                                                                                           | 8.7   | Guerin et al., 2020          |
| <i>P. canariensis</i> var. <i>red</i>              |                                                       | Caf 1; Cat 36; <i>m</i> Cou 10; <i>p</i> Cou 1; Epi 11; Gal 29; Isoq 15; Rut 3 mg/100 g dw                                                                | 0.3   | Turki et al., 2020           |
| <i>P. canariensis</i> var. <i>yellow</i>           |                                                       | Cat 8; <i>m</i> Cou 1; Epi 56; Gal 42; Isoq 90; Rut 17 mg/100 g dw                                                                                        | 0.8   | Turki et al., 2020           |
| <i>P. canariensis</i>                              | CA 1, LaA 25-30, MA 11-12, PA 9, SA 3, OA 37-42, LA 8 | Aca 0-1; Caf 1-101; CiA 12-36; Cir 1; <i>o</i> Cou 11-12; CIA TPC: 91-403 mg/100 g 0-100; Fer 6-11; Gal 20-35; Hyp 0-1; Nar 0-2; Pt 0-82; Rut 1; Syr 4-11 | 9.8   | Hamza et al., 2021           |
| <i>Phoenix dactylifera</i> var. <i>Deglet Nour</i> |                                                       | Caf 1; Gal 1; HyT 2; Olr 1; Pt 1; Tyr 1 mg/100 g TPC: 52 mg CAE/100 g                                                                                     |       | Besbes et al. 2004a          |
| <i>Phoenix dactylifera</i> var. <i>Deglet Nour</i> | LaA 18, MA 10, PA 11, SA 6, OA 41, LA 12, ALA 2       |                                                                                                                                                           | 10.2  | Besbes et al. 2004b          |
| <i>Phoenix dactylifera</i> var. <i>Deglet Nour</i> |                                                       | Cat 17; Epi 10; Pt 1; PA2 2; PB1 50; PB2 58 mg/100 g                                                                                                      |       | Sirisena et al., 2017        |
| <i>P. dactylifera</i> var. <i>Deglet Nour</i>      | LaA 17, MA 11, PA 11, SA 5, OA 45, LA 9               |                                                                                                                                                           | 8.6   | García González et al., 2019 |
| <i>P. dactylifera</i> var. <i>Deglet Nour</i>      | LaA 22, MA 9, PA 9, SA 4, OA 46, LA 7                 | Caf 1; Cat 24; Fer 1; HyTy 1; Lut 3; LutGlyc 1; Olr 1; TPC 155 mg GAE/100 g Tyr 2; Van 15; VanA 4 mg/100 g                                                | 4.9   | Harkat et al., 2022          |
| <i>P. dactylifera</i> var. <i>Deglet Nour</i>      | LaA 16, MA 9, PA 11, SA 5, OA 43, LA 14, ALA 2        | Caf 0.1; Cat 0.5; Gal 0.5; Ru 0.1; Syr 0.2 mg/100 g                                                                                                       | 9.2   | Al-Juhaimi et al., 2018      |
| <i>P. dactylifera</i> var. <i>Medjool</i>          | LaA 20, MA 12, PA 10, SA 3, OA 45, LA 9               | TFC 2 g RE/100 g TPC 3 g GAE/100 g                                                                                                                        | 5.6   | Bouhlali et al., 2017        |
| <i>P. dactylifera</i> var. <i>Medjool</i>          | LaA 20, MA 10, PA 11, SA 3, OA 46, LA 8, ALA 1        | Caf 0.2; Cat 0.6; Gal 0.5; Ru 0.1; Syr 0.2 mg/100 g                                                                                                       | 5.8   | Al Juhaimi et al., 2018      |
| <i>P. dactylifera</i> var. <i>Medjool</i>          | LaA 17, MA 10, PA 11, SA 5, OA 47, LA 9               |                                                                                                                                                           | 5.4   | García González et al., 2019 |
| <i>P. dactylifera</i>                              |                                                       | CafH, Cat, Hcaf, Epi, Isor, <i>p</i> Cou, PraCdi ~7000-8500 mg GAE/100 g                                                                                  |       | John and Shahidi, 2019       |

|                                        |                                                           |                                                                                                                  |      |                      |
|----------------------------------------|-----------------------------------------------------------|------------------------------------------------------------------------------------------------------------------|------|----------------------|
| <i>P. dactylifera</i>                  | LaA 21, MA 12, PA 10, SA 4, OA 42, LA 9                   |                                                                                                                  | 10.3 | Guerin et al., 2020  |
| <i>Phoenix reclinata</i>               | CyA 1, CA 1, LaA 29, MA 14, PA 9, SA 1, OA 34, LA 12 mol% |                                                                                                                  | -    | Litchfield, 1970     |
| <i>P. reclinata</i>                    | LaA 22, MA 11, PA 10, SA 2, OA 35, LA 20                  |                                                                                                                  | 7.8  | Guerin et al., 2020  |
| <b>Tribe Sabaleae</b>                  |                                                           |                                                                                                                  |      |                      |
| <i>Sabal berrnudana</i>                | LaA 11, MA 8, PA 12, SA 2, OA 40, LA 25                   |                                                                                                                  | 8.3  | Guerin et al., 2020  |
| <i>Sabal domingensis</i>               | LaA 13, MA 13, PA 11, SA 2, OA 43, LA 17                  |                                                                                                                  | 11.0 | Guerin et al., 2020  |
| <i>Sabal minor</i>                     | CyA 1, CA 1, LaA 22, MA 6, PA 7, SA 2, OA 40, LA 19       |                                                                                                                  | 5.0  | Guerin et al., 2020  |
| <i>S. palmetto</i>                     | CyA 1, CA 1, LaA 22, MA 10, PA 9, SA 1, OA 31, LA 26 mol% |                                                                                                                  | 5.6  | Litchfield, 1970     |
| <i>S. palmetto</i>                     | LaA 16, MA 10, PA 7, SA 5, OA 46, LA 15                   |                                                                                                                  | 8.0  | Opute, 1979          |
| <i>S. palmetto</i>                     |                                                           | <i>bis-O-[(I-4') → (II-6')] - α-hydroxyphloretin-2'-O-β-glucoside, (-)-Epi, (-)-Epia, pHBA, Pt, MeGal</i>        |      | Bar, 2014            |
| <i>S. palmetto</i>                     | CY 1, CA 1, LaA 21, MA 10, PA 8, SA 2, OA 40, LA 15       |                                                                                                                  | 9.8  | Guerin et al., 2020  |
| <i>S. palmetto</i>                     |                                                           | Caf 2, Cat 4, CIA 7, Gal 1, pHBA 1, Pt 1.1, Syr 7, 142 TFC: 11-207 mg CE/100 g DW<br>TPA: 25-840 mg GAE/100 g DW |      | Barakat et al., 2020 |
| <b>Tribe Trachycarpeae</b>             |                                                           |                                                                                                                  |      |                      |
| <i>Chamaerops humilis</i>              | CyA 3, CA 4, LaA 27, MA 10, PA 10, SA 2, OA 31, LA 14     |                                                                                                                  | 8.7  | Litchfield, 1970     |
| <i>Chamaerops humilis</i> var.         | LaA 13, MA 6, PA 12, SA 3, OA 44, LA 20                   | 9.1                                                                                                              | 9.9  | Mokbli et al., 2018  |
| <i>C. humilis</i> var. <i>argentea</i> | LaA 21, MA 7, PA 10, SA 4, OA 39, LA 15                   | -                                                                                                                | 9.8  | Mokbli et al., 2018  |

|                              |                                                            |      |                     |
|------------------------------|------------------------------------------------------------|------|---------------------|
| <i>Chamaerops humilis</i>    | CY 3, CA 3, LaA 28, MA 9, PA 9, SA 3, OA 29, LA 15         | 10.4 | Guerin et al., 2020 |
| <i>Livistona chinensis</i>   | CyA 1, CA 1, LaA 22, MA 9, PA 14, SA 3, OA 29, LA 22 mol%  | 4.7  | Litchfield, 1970    |
| <i>L. chinensis</i>          | LaA 15, MA 6, PA 14, SA 2, OA 27, LA 34, ALA 1             | 2.9  | Guerin et al., 2020 |
| <i>Livistona saribus</i>     | CyA 1, CA 1, LaA 23, MA 10, PA 12, SA 3, OA 31, LA 19      | 4.0  | Guerin et al., 2020 |
| <i>Trachycarpus fortunei</i> | LaA 9, MA 12, PA 8, SA 2, OA 32, LA 35                     | 4.1  | Guerin et al., 2020 |
| <i>Washingtonia robusta</i>  | CyA 1, CA 1, LaA 18, MA 13, PA 10, SA 2, OA 38, LA 19 mol% | 10.9 | Litchfield, 1970    |
| <i>W. robusta</i>            | CyA 1, CA 1, LaA 23, MA 14, PA 8, SA 2, OA 36, LA 15       | 13.2 | Guerin et al., 2020 |

**Abbreviations for fatty acids:** CO: caproic acid, CyA: caprylic acid, CA: capric acid, LaA: lauric acid, MA: miristic acid, PA: palmitic acid, SA: stearic acid, OA: oleic acid, LA: linoleic acid, ALA:  $\alpha$ -linolenic acid

**Abbreviations for phenolics:** Aca: acacetin; 4Caf: 4-O-Caffeoylquinic acid; CAE: caffeic acid equivalents; Hcaf: hydrocaffeic acid; Caf: caffeic acid; CafH: caffeoyl hexoside; Cat: catechin; CE: catechin equivalents; CiA: cinnamic acid; Cir: cirsilinoleic; CIA: chlorogenic acid; *m*Cou: *m*-coumaric acid; *p*Cou: *p*-coumaric acid; *o*Cou: *o*-coumaric acid; DW: dry weight; Epi: epicatechin; Epia: epiafzelechin; Fer: ferulic acid; FW: fresh weight; Gal: gallic acid; GAE: gallic acid equivalents; *p*HBA: *p*-hydroxybenzoic acid; Hyp: hyperoxide; HyTyr: Hydroxytyrosol; Isoq: isoquercitrin; Isor: isorhamnetin; Lut: luteolin; LutGlyc: Luteolin-4-O-glucoside; MeGal: methyl gallate; Nar: naringenin; Olr: oleorupin; PA2: Procyanidin A2; PB1: Procyanidin B1; PB2: Procyanidin B2; PraCdi: proanthocyanidin dimer isomers; Pt: protocatechuic acid; RE: rutin equivalents; Rut: rutin; Sal: salicylic acid; Syr: syringic acid; TFC: total flavonoids content; TPC: total phenolics content; Tyr: tyrosol; Van: vanillin; VanA: vanillic acid

<sup>a</sup>Significant figures without decimals

## References

- Al-Juhaimi, F.; Özcan, M.M.; Adiamo, O.Q.; Alsawmahi, O.N.; Ghafoor, K.; Babiker, E.E. Effect of date varieties on physico-chemical properties, fatty acid composition, tocopherol contents, and phenolic compounds of some date seed and oils. *J. Food Proc. Preserv.* **2018**, *42*, e13584.
- Appaiah, P.; Sunil, L.; Prasanth-Kumar, P.K.; Gopala-Krishna, A.G. Composition of coconut testa, coconut kernel and its oil. *J. Am. Oil Chem. Soc.* **2014**, *91*, 917-924.
- Bar, F.A. New chalconol glycoside from the seeds of saw palmetto: Antiproliferative and antioxidant effects. *Nat. Prod. Res.* **2014**, *29*, 926-932.
- Bar, F.A. New chalconol glycoside from the seeds of saw palmetto: Antiproliferative and antioxidant effects. *Nat. Prod. Res.* **2014**, *29*, 926-932.

- Barakat, A.Z.; Hamed, A.R.; Bassuiny, R.I.; Abdel-Aty, A.M.; Mohamed, S.A. Date palm and saw palmetto seeds functional properties: Antioxidant, anti-inflammatory and antimicrobial activities. *J. Food Meas. Charact.* **2020**, *14*, 1064–1072.
- Besbes, S.; Blecker, C.; Deroanne, C.; Bahloul, N.; Lognay, G.; Drira, N.E.; Attia, H. Date seed oil: Phenolic, tocopherol and sterol profiles. *J. Food Lipids* **2004a**, *11*, 251–265.
- Besbes, S.; Blecker, C.; Deroanne, C.; Drira, N. E.; Attia, H. Date seeds: chemical composition and characteristic profiles of the lipid fraction. *Food Chem.* **2004b**, *84*, 577–584.
- Bouhlali, E.T.; Alem, C.; Ennassir, J.; Benlyas, M.; Mbark, A.N.; Zegzouti, Y.F. Phytochemical compositions and antioxidant capacity of three date (*Phoenix dactylifera* L.) seeds varieties grown in the South East Morocco. *J. Saudi Soc. Agric. Sci.* **2017**, *16*, 350–357.
- Chang, C.C.; Lee, S.S. Application of HPLC-SPE-NMR in characterization of bioactive natural compounds. In Instrumental Methods for the Analysis and Identification of Bioactive Molecules, K.J. Guddadarangavvanahally; S.P. Bhimanagouda; Pellati, F. Eds.; American Chemical Society: United States, 2014; Vol. 1185, pp. 217–239.
- Coimbra, M.C.; Jorge, N. Fatty acids and bioactive compounds of the pulps and kernels of Brazilian palm species, guariroba (*Syagrus oleracea*), jervivá (*Syagrus romanzoffiana*) and macaúba (*Acrocomia aculeata*). *J. Sci. Food Agric.* **2012**, *92*, 679–684.
- Daulatabad, C.D.; Ankalg, R.E. Component Fatty Acids of Some Indian Seed Oils. *Fette Seifen Anstrichm.* **1983**, *85*, 404–406.
- García-González, C.; Salomón-Torres, R.; Montero-Alpírez, G.; Chávez-Velasco, D.; Ortiz-Urbe, N.; Ruiz-Ortiz, N.S.; Coronado-Ortega, M.A.; Curiel-Alvarez, M.A. Effect of pollen sources on yield oil extraction and fatty acid profile of the date seed (*Phoenix dactylifera* L.) cultivar Medjool from Mexico. *Grasas y Aceites* **2019**, *70*, 315.
- Ghosh, P.K.; Bhattacharjee, P.; Mitra, S.; Poddar-Sarkar, M. Physicochemical and phytochemical analyses of copra and oil of *Cocos nucifera* L. (West Coast Tall variety). *Int. J. Food Sci.* **2014**, *2014*, 310852.
- Guerin, C.; Serret, J.; Montúfar, R.; Vaissayre, V.; Bastos-Siqueira, A.; Durand-Gasselin, T.; Tregear, J.; Morcillo, F.; Dussert, S. Palm seed and fruit lipid composition: Phylogenetic and ecological perspectives. *Ann. Bot.* **2020**, *125*, 157–172.
- Hamza, H.; Elfalleh, W.; Nagaz, K. Date Palm Seed Oil (*Phoenix dactylifera* L.) Green Extraction: Physicochemical Properties, Antioxidant Activities, and Phenolic and Fatty Acid Profiles. *J. Food Qual.* **2021**, *2021*, 1–9.
- Harkat, H.; Bousba, R.; Benincasa, C.; Atrouz, K.; Gültekin-Özgüven, M.; Altuntas, Ü.; Demircan, E.; Zahran, H.A.; Özçelik, B. Assessment of biochemical composition and antioxidant properties of Algerian date palm (*Phoenix dactylifera* L.) seed oil. *Plants* **2022**, *11*, 381.
- John, J.A.; Shahidi, F. Phenolic content, antioxidant and anti-inflammatory activities of seeds and leaves of date palm (*Phoenix dactylifera* L.). *J. Food Bioact.* **2019**, *5*, 120–130.

- Litchfield, C. Taxonomic patterns in the fat content, fatty acid composition, and triglyceride composition of Palmae seeds. *Chem. Phys. Lipids* **1970**, *4*, 96–103.
- Mahayothee, B.; Koomyart, I.; Khuwijitjaru, P.; Siri Wongwilaichat, P.; Nagle, M.; Müller, J. Phenolic compounds, antioxidant activity, and medium chain fatty acids profiles of coconut water and meat at different maturity stages. *Int. J. Food Prop.* **2016**, *19*, 2041–2051.
- Mokbli, S.; Sbihi, H.M.; Nehdi, I.A.; Romdhani-Younes, M.; Tan, C.P.; Al-Resayes, S.I. Characteristics of *Chamaerops humilis* L. var. *humilis* seed oil and study of the oxidative stability by blending with soybean oil. *J. Food Sci. Technol.* **2018**, *55*, 2170–2179.
- Moreira, M.; Arrúa, M.P.; Antunes, A.; Fiuza, T.; Costa, B.; Neto, P.W.; Antunes, S. Characterization of *Syagrus romanzoffiana* oil aiming at biodiesel production. *Ind. Crop Prod.* **2013**, *48*, 57–60.
- Ndukwe, G.; Ugboaja, A. Acid-Base Catalyzed Transesterification of *Archontophoenix cunninghamiana* (Bangalow Palm) Seed Oil. *J. Appl. Sci. Environ. Manag.* **2019**, *23*, 1717.
- Nehdi, I.A.; Zarrouk, H.; Al-Resayes, S.I. Changes in chemical composition of *Phoenix canariensis* Hort. Ex Chabaud palm seed oil during the ripening process. *Sci. Hortic.* **2011**, *129*, 724–729.
- Ngampeerapong, C.; Chavasit, V. Nutritional and bioactive compounds in coconut meat of different sources: Thailand, Indonesia and Vietnam. *CMU J. Nat. Sci.* **2019**, *18*, 562–573.
- Opote, F.I. The seed lipids of the palm family. *J. Am. Oil Chem. Soc.* **1979**, *56*, 528–530.
- Rodrigues, C. E.; Schäfer, L.; Gregolon, J. G. N.; De Oliveira, J. F.; Baez, O. P.; Deolindo, C. T. P.; De Melo, A.P.Z.; Singer, R.B.; Kist, T.B.L.; Hoff, R. Determination of amino acid content, fatty acid profiles, and phenolic compounds in non-conventional edible fruits of seven species of palm trees (Arecaceae) native to the southern half of South America. *Food Res. Int.* **2022**, *162*, 111995.
- Sirisena, S.; Zabarar, D.; Ng, K.; Ajlouni, S. Characterization of date (Deglet Nour) seed free and bound polyphenols by high-performance liquid chromatography-mass spectrometry. *J. Food Sci.* **2017**, *82*, 333–340.
- Tavares, T.; Magalhães, K.; Lorenzo, N.; Nunes, C. Thermal and chemical characterization of fractions from *Syagrus romanzoffiana* kernel oil. *Grasas y Aceites* **2021**, *72*, e420.
- Turki, M.; Barbosa-Pereira, L.; Bertolino, M.; Essaidi, I.; Ghirardello, D.; Torri, L.; Bouzouita, N.; Zeppa, G. Physico-Chemical Characterization of Tunisian Canary Palm (*Phoenix canariensis* Hort. Ex Chabaud) Dates and Evaluation of Their Addition in Biscuits. *Foods* **2020**, *9*, 695.

Vieira, B.M.; Elicker, C.; Nunes, C.F.P.; Bairos, A.V.; Becker, E.M.; Oliveira, D.M.; Piva, E.; Fontoura, L.A.M.; Pereira, C.M.P. The synthesis and characterization of *Butia capitata* seed oil as a FAME feedstock. *Fuel* **2016**, *184*, 533-535.
